# Supplementary material for: Evaluation of the Prevalence of Staphylococcus aureus in Chicken Fillets and Its Bio-Control Using Different Seaweed Extracts
Source: MDPI journal article supplement (doi:10.3390/foods12010020), 2022-12-21
Supplement: s1 [file s1]

**Table S1.** Prevalence of *S. aureus* in chicken fillet collected from different local markets ( $n= 100$ ).

| Types of<br>Chicken Fillets                     | Negative Samples |    | Positive Samples |    |
|-------------------------------------------------|------------------|----|------------------|----|
|                                                 | No.              | %  | No.              | %  |
| Breast (n=50)                                   | 4                | 8  | 46               | 92 |
| Thigh (n=50)                                    | 8                | 16 | 42               | 84 |
| Total (n=100)                                   | 12               | 12 | 88               | 88 |
| Note: Chi <sup>2</sup> = 1.515 $p$ -value >0.05 |                  |    |                  |    |

**Table S2.** HPLC evaluation for phenolic profile of lyophilized HO algal extract.

| <b>Phenolic Compounds</b> | <b>RT</b> | <b>Concentration (µg/mL)</b> |
|---------------------------|-----------|------------------------------|
| Gallic acid               | 3.424     | 4.06                         |
| Catechin                  | 4.666     | 0.73                         |
| Methyl gallate            | 5.660     | 0.23                         |
| Caffeic acid              | 6.122     | 1.78                         |
| Syringic acid             | 6.638     | 2.35                         |
| Ellagic acid              | 8.900     | 2.91                         |
| Ferulic acid              | 10.308    | 0.53                         |
| Naringenin                | 10.533    | 0.92                         |
| Daidzein                  | 12.301    | 10.84                        |
| Quercetin                 | 12.796    | 0.96                         |
| Cinnamic acid             | 14.129    | 0.89                         |
| Apigenin                  | 14.588    | 2.79                         |
| Kaempferol                | 15.102    | 1.53                         |
| Hesperetin                | 15.707    | 0.96                         |

RT: retention time (min).

**Table S3.** Cytotoxicity evaluation of lyophilized HO algal extract on the viability of peripheral blood mononuclear cells (PBMCs).

| Concentration (µg/mL) | Inhibition % | Viability % |
|-----------------------|--------------|-------------|
| 250                   | 69           | 31          |
| 125                   | 69           | 31          |
| 62.5                  | 64           | 36          |
| 31.2                  | 30           | 70          |
| 15.6                  | 29           | 71          |
| 7.8                   | 27           | 73          |
| IC <sub>50</sub>      | 33.7 µg/mL   |             |
